# Supplementary material for: Validation of XCO 2 and XCH 4 retrieved from a portable Fourier transform spectrometer with those from in situ profiles from aircraft-borne instruments
Source: Copernicus journal article supplement (doi:10.5194/amt-13-5149-2020), 2020-09-30
Supplement: Supplementary file 1 [file amt-13-5149-2020-supplement.pdf]

Supplement of Atmos. Meas. Tech., 13, 5149–5163, 2020  
<https://doi.org/10.5194/amt-13-5149-2020-supplement>  
© Author(s) 2020. This work is distributed under  
the Creative Commons Attribution 4.0 License.

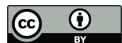

*Supplement of*

## **Validation of $XCO_2$ and $XCH_4$ retrieved from a portable Fourier transform spectrometer with those from in situ profiles from aircraft-borne instruments**

**Hirofumi Ohyama et al.**

*Correspondence to:* Hirofumi Ohyama (oyama.hirofumi@nies.go.jp)

The copyright of individual parts of the supplement might differ from the CC BY 4.0 License.

## Supplementary material

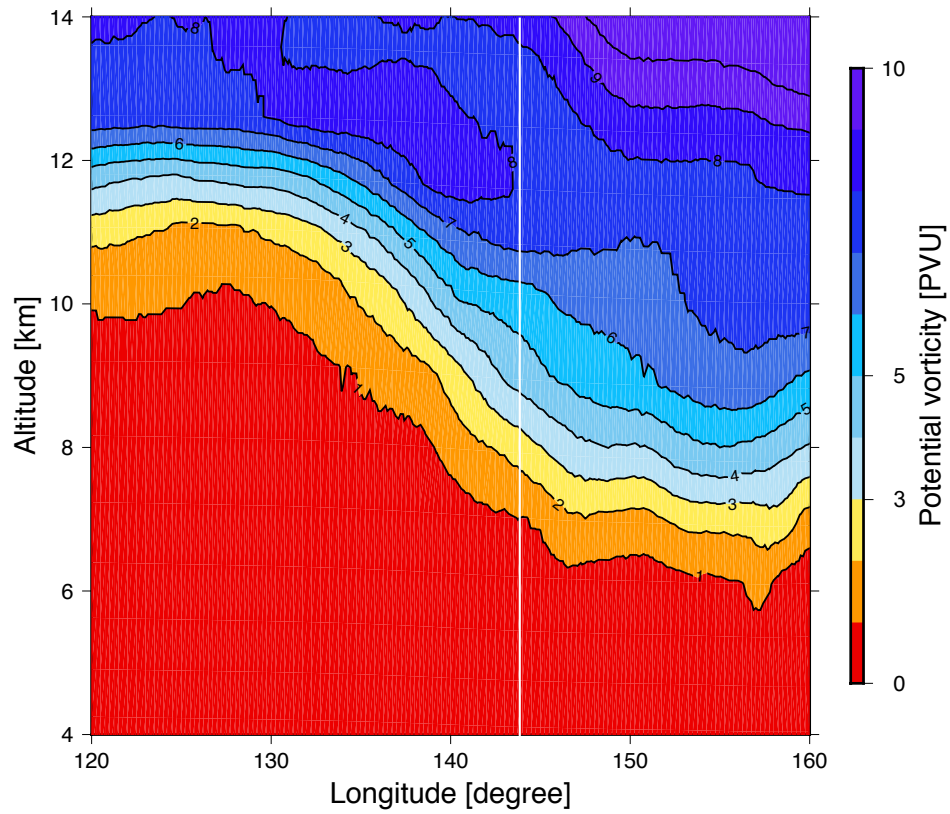

Figure S1. Altitude-longitude cross section between 42° and 45°N of potential vorticity values from the ERA5 at 02:00 UTC on 27 April 2016. Vertical white line indicates the location (longitude) of Rikubetsu.
